1 **Variable costs of eavesdropping a green leaf volatile on two plant species in a common**  
2 **garden experiment**

3  
4  
5  
6  
7  
8  
9  
10

Grace E. Freundlich and Christopher J. Frost

Department of Biology, University of Louisville, Louisville, KY, USA

11  
12 Running Title: Fitness costs of plant exposure to volatile cues  
13

14  
15 Author for Correspondence:

16 Christopher J. Frost  
17 139 Life Sciences Building  
18 University of Louisville  
19 Louisville, KY 40292  
20 502-852-6771  
21 [chris.frost@louisville.edu](mailto:chris.frost@louisville.edu)  
22

23  
24 Manuscript Data:

25 Abstract: 208  
26 Main Text (excluding Abstract): 3762  
27 Introduction: 802  
28 Materials and Methods: 1008  
29 Results: 484  
30 Discussion: 1463  
31  
32 Tables:0  
33 Figures: 5  
34 Number of References: 89  
35 Supplemental Tables: 5  
36 Supplemental Figures: 3  
37  
38

39 **Abstract**

- 40 1. Herbivore-induced plant volatiles (HIPVs) from one plant may cue eavesdropping  
41 neighboring plants to prepare, or ‘prime’, defenses prior to experiencing herbivory.  
42 HIPV-mediated defense priming is now a well-documented, inducible phenomenon that  
43 should—like any inducible phenomenon—incur fitness costs. Yet, ecological costs  
44 associated with exposure to volatile cues alone are not clear.
- 45 2. For the first time under field conditions, we tested the hypothesis that exposure to a single  
46 HIPV would decrease herbivore damage at the cost of reduced plant growth and  
47 reproduction. In a common garden experiment, we exposed lima bean (*Phaseolus*  
48 *lunatus*) and pepper (*Capsicum annuum*) plants to a persistent, low-dose (~10ng/hour) of  
49 the green leaf volatile *cis*-3-hexenyl acetate (*z*3HAC), which is a HIPV that alone can  
50 prime plant defense.
- 51 3. *z*3HAC-treated pepper plants were shorter, had less aboveground and belowground  
52 biomass, and produced fewer flowers and fruits relative to controls. In contrast, *z*3HAC-  
53 treated lima bean plants were taller and produced more leaves and flowers than did  
54 controls. Additionally, we observed species-specific differences in herbivore damage:  
55 herbivory was reduced only in *z*3HAC-exposed lima bean plants but not pepper plants.
- 56 4. Synthesis: Differential responses to an identical priming cue in a shared common field  
57 have important implications for ecological costs and benefits of volatile-mediated inter-  
58 plant communication.

59

60 **Keywords:** *cis*-3-hexenyl acetate, lima bean, pepper, plant fitness, plant volatiles, priming

## 61 **Introduction**

62           Production and utilization of airborne chemical cues is prevalent within the plant  
63 kingdom. Plants depend on airborne chemical signaling for pollination (Muhlemann et al.,  
64 2014), indirect defense (Mumm and Dicke, 2010), protection from pathogens (Frag et al.,  
65 2013), and herbivore resistance (Frost et al., 2008b). Volatile communication is also pivotal for  
66 plant-plant signaling, and selection for such signaling depends on honest cues that reliably confer  
67 ecologically relevant information. For example, herbivory is a fundamental ecological  
68 interaction that impacts plant fitness, and many plants increase the production and emission of  
69 volatile compounds in response to herbivore damage (Turlings et al., 1995). Such herbivore-  
70 induced plant volatiles (HIPVs) are potentially reliable cues around which plant-plant  
71 eavesdropping could be evolutionarily adaptive. Undamaged plants (or parts of the same plant  
72 (Frost et al., 2007, Heil and Silva Bueno, 2007)) eavesdropping on HIPVs from a plant  
73 experiencing herbivory may directly trigger stress responses (Heil and Karban, 2010, Pearse et  
74 al., 2013, Arimura et al., 2002), or alternatively prime responses for future potential herbivory  
75 (Frost and Hunter, 2008)).

76           HIPV-mediated priming appears to be a common phenomenon. HIPVs have  
77 demonstrated priming ability in corn (Frag et al., 2005, Erb et al., 2015), tomato (Frag and  
78 Paré, 2002), poplar (Frost et al., 2008b, Frost et al., 2007), blueberry (Rodriguez-Saona et al.,  
79 2009) and lima bean (Sarai Giron-Calva et al., 2012, Arimura et al., 2008). HIPVs can be  
80 diverse and taxa-specific (Arimura et al., 2009, Copolovici et al., 2011), but are often comprised  
81 of monoterpenes, sesquiterpenes, benzenoids and green leaf volatiles GLVs (Boggia et al., 2015,  
82 Engelberth et al., 2004). In contrast to volatile terpenes and benzenoids (Paschold et al., 2006,  
83 Arimura et al., 2009), GLVs are immediately released into the airspace whenever leaves are

84 mechanically damaged (Matsui et al., 2012) serving as early indicators of wounding. GLV  
85 exposure alters gene expression profiles related to specialized metabolite production and  
86 accumulated secondary metabolite precursors in preparation for inducing resistance (Pastor et al.,  
87 2014). For example, the GLV *cis*-3-hexenyl acetate ( $\alpha$ 3HAC) induces transcriptional changes in  
88 poplar (Frost et al., 2008b) and maize (Engelberth et al., 2004) that prime oxylipin signaling and  
89 induced resistance. Among the GLVs,  $\alpha$ 3HAC may represent a reliable cue because it is  
90 typically released from herbivore-damaged leaves and not by mechanically damaged leaves in a  
91 variety of species (Matsui et al., 2012), including tomato (Frag and Paré, 2002), maize  
92 (Engelberth et al., 2004), *Arabidopsis* (D'Auria et al., 2007), and poplar (Frost et al., 2008b,  
93 McCormick et al., 2014).

94 Fitness costs incurred by plants exposed to HIPV cues are largely unknown. Ecological  
95 theory posits that induced resistance by plants against herbivores is a cost-savings strategy to  
96 restrict the deployment of costly specialized defensive metabolites until necessary (Accamando  
97 and Cronin, 2012, Cipollini et al., 2003). However, inducible resistance generates a period of  
98 vulnerability between the time of attack and the upregulation of resistance (Cipollini and Heil,  
99 2010). Defense priming via sensory perception of early reliable cues may overcome such a  
100 vulnerability by allowing a plant to anticipate a probable attack. Therefore, priming is an  
101 inducible phenomenon and theory predicts that responding to cues alone should incur fitness  
102 costs that select against maintaining a “primed state” unless reliable cues are detected (Douma et  
103 al., 2017, Frost et al., 2008a). In other words, perception of a cue resulting in defense priming  
104 may induce physiological changes that affect fitness that are less costly than induced resistance  
105 itself. Non-volatile priming agents  $\beta$ -amino butyric acid (BABA) (van Hulten et al., 2006) and  
106 snail mucus (Orrock, 2018) both support this prediction. Similarly, fitness costs associated with

107 volatile perception alone that initiate priming should be less severe than costs of induced  
108 resistance to actual herbivory. Yet there is currently limited experimental evidence of such costs  
109 with respect to anti-herbivore volatile cues. For example, whereas bacterial-derived volatiles 3-  
110 pentanol and 2-butanone decrease reproductive output in field-grown *Cucumis sativa* (Song and  
111 Ryu, 2013), wild tobacco (*Nicotiana attenuata*) exposed to airspace of experimentally clipped  
112 sagebrush produce more seeds (i.e., higher presumptive fitness) relative to control plants (Karban  
113 and Maron, 2002). These results suggest that ecological costs of exposure to volatile cues may be  
114 context dependent, but comparative cost/benefit tradeoffs for perception of HIPVs alone among  
115 sympatric field-grown plants is currently lacking.

116 Here, we report a common garden field experiment with lima bean (*Phaseolus lunatus*)  
117 and chili pepper (*Capsicum annum*) testing the hypothesis that field plants subject to a persistent  
118 dose of an ostensibly reliable volatile cue incur consistent fitness costs reflected in reduced  
119 growth and reproduction. We treated individuals of both species to repeated low-dose  
120 applications of  $\alpha$ 3HAC and measured their growth, reproduction, and herbivore damage  
121 throughout the growing season. Based on the theory of defense priming (Frost et al., 2008a), we  
122 predicted that exposure to  $\alpha$ 3HAC—regardless of plant species identity—would reduce growth  
123 and reproductive output, while also reducing natural herbivory.

124

## 125 **Materials and Methods**

### 126 Study Site and Plants

127 A common garden experiment was established on a 54m<sup>2</sup> plot within Blackacre Conservancy's  
128 community garden in Louisville, Kentucky (38°11'33.8"N 85°31'28.3"W; Supplemental Fig. 1).  
129 The field site was enclosed in a mesh fence to exclude mammalian herbivores. *Phaseolus*

130 *lunatus*, Fabaceae, variety Fordham Hook 242 ('lima bean') and the *Capsicum annuum*,  
131 Solanaceae, variety Cayenne pepper, Joe Red Long ('pepper') were chosen as phylogenetically  
132 distinct model plants with previously established defense profiles (Ballhorn et al., 2008,  
133 Zachariah et al., 2010). Lima bean is an annual (semelparous) species, while pepper is a  
134 perennial (iteroparous) species in its native range (USDA, NRCS, 2018). Seeds were purchased  
135 from the Louisville Seed Company (Louisville, KY, USA), and germinated in Metromix 510© in  
136 May 2016 in the Biology Department's greenhouse. After reaching ~20cm in height, 132 lima  
137 bean plants were transplanted to the field May 30, 2016, and 98 pepper plants were transplanted  
138 to the field June 28, 2016. Within the field site, plants were planted in alternating rows of twos  
139 of lima bean and pepper. Previous studies with sagebrush (Karban et al., 2006) and lima bean  
140 (Heil and Adame-Alvarez, 2010) indicate that volatile cues are effective over relatively short  
141 distances of less than 100cm. Therefore, all plants in our experiment were spaced one meter  
142 apart from one another in all directions to reduce the risk of interplant communication and cue  
143 crossover.

144

#### 145 Volatile exposure

146 Plants were acclimated to the field for one week after planting before volatile treatments  
147 began. To simulate a naturally occurring low dose (Engelberth et al., 2007, Shiojiri et al., 2012),  
148 plants were exposed to lanolin infused paste equivalent to 10ng/hr of  $\alpha$ 3HAC. This concentration  
149 is 25% of that which previously primed poplar (Frost et al., 2008b) and maize (Engelberth et al.,  
150 2004). A treatment vial contained 50mg of a 30ng/ $\mu$ l  $\alpha$ 3HAC/lanolin, while a control vial  
151 contained 50mg of lanolin. Each glass vial had a 9mm aperture and was maintained at -80°C  
152 until use. Each week, both the  $\alpha$ 3HAC-infused lanolin vials and lanolin-only controls were

153 placed at the bottom of their respective plants. Each vial was inverted and supported with a wire  
154 stand and each vial was wrapped in aluminum foil to reduce photo degradation (von Meroy et al.,  
155 2011) (Supplemental Fig. 2). Plants were randomly assigned to either z3HAC treatment (lima  
156 bean n=63; pepper n=35) or lanolin control (lima bean n=72; pepper n=43). The unit of  
157 replication was an individual plant and each plant received its own vial. Random assignment of  
158 treatments was made using blocks of 4 adjacent plants; block was included as a random factor in  
159 statistical models, and was not a significant factor in any of the models.

160

### 161 Growth, biomass, and reproduction measurements

162 We measured height and total leaf counts routinely on the experimental plants. Leaves  
163 were only counted if they were wider than 2cm across for both species while height  
164 measurements for both species were recorded from the base of the plant to the uppermost  
165 branching point. For lima bean, height was determined by measuring the longest runner within  
166 the bush, while pepper plants were measured from the base of the main stalk to the highest  
167 branching point. Along with height, the total number of leaves per plant was measured  
168 throughout the field season. A complete biomass harvest was conducted on pepper for leaves,  
169 roots, and stems at the end of the field season. All leaves and fruits were separated into paper  
170 bags before individual plants were extracted from of the ground. After removal, roots and stems  
171 were separated, roots were washed with water to remove dirt, and placed into separate paper  
172 bags. All materials were dried at 60°C for 24 hours and then weighed. A biomass harvest for  
173 lima bean was not performed because an *Epliachna varivestis* (Mexican Bean Beetle) outbreak  
174 late in the season removed much of the leaf tissue before we could determine reliable biomass  
175 measurements.

176 We measured total flower and fruit production as proxies for reproductive fitness.  
177 Flowers were recorded if they were true flowers with fully mature pistils and stamen. If a flower  
178 was not fully mature, it was recorded as a flower bud. Fruits were recorded as soon as fruit  
179 development was observed with either initial pod or exocarp development. Throughout the field  
180 season, fruit and flower counts per plant were recorded along with the number of mature and  
181 immature fruits.

182 From the fruits harvested from the final biomass harvest, ~10 randomly selected, mature  
183 fruits from each pepper plant were chosen for seed count analysis (188 fruits from z3HAC-  
184 treated plants and 210 fruits from controls). Dried fruits were dissected with a scalpel and all  
185 seeds were isolated and counted.

186

## 187 Herbivory

188 Since previous work has shown that z3HAC enhances induced defense against both  
189 pathogens and herbivores through defense priming (Frost et al., 2008b, Ameye et al., 2015), we  
190 monitored herbivory throughout the season. Leaf chewing damage was assessed for both pepper  
191 and lima bean as percent leaf area removed (LAR) using a visual estimation technique (Frost and  
192 Hunter, 2004, Frost and Hunter, 2008) with the following damage categories: 0%, 0-5%, 5-15%,  
193 15-30%, 30-50%, 50-70%, 70-90%, and >90%. For each damage assessment, every leaf on a  
194 plant was categorized into one of the damage categories, and an overall percent damage was  
195 determined as a weighted average of all leaves. Plants were also routinely monitored for the  
196 presence of naturally occurring chewing and piercing/sucking herbivores. In particular, we  
197 noted a natural occurrence of the black bean aphid (*Aphis faba*), and recorded its  
198 presence/absence on lima bean plants in the field.



199

## 200 Statistical analyses

201 All statistical analyses were performed in R (version 3.4.2) with the lme4 and multcomp  
202 packages. Growth data, such as plant height, leaf area removed, and flower counts, were  
203 analyzed using repeated measures ANOVA with the aov function with a Gaussian distribution.  
204 For repeated measures analyses, we treated date as a within-subjects effect and treatment as a  
205 between-subjects effect for all analyses. Differences between treatments at each individual time  
206 point, as well as all biomass data, were analyzed using one-way ANOVA (glmer function)  
207 followed by a Tukey's post hoc comparison.

208

## 209 **Results**

210 Treatment with z3HAC differentially affected the growth of lima bean and pepper plants.  
211 On average, z3HAC-treated lima bean grew 11% taller compared to control plants throughout the  
212 field season (Fig.1a;  $F_{2,927}=9.688$ ,  $P=0.002$ ) and produced 17% more leaves overall than did  
213 controls (Fig.1b;  $F_{1,571}=4.339$ ,  $P=0.038$ ). In contrast, z3HAC-treated pepper plants were 12%  
214 shorter relative to controls (Fig.1c;  $F_{1,157}=0.005$ ,  $P=0.942$ ) and produced 23% fewer leaves over  
215 the field season (Fig.1d;  $F_{1,237}=21.58$ ,  $P<0.001$ ). Consistent with height and leaf counts, z3HAC  
216 treatment reduced overall biomass of pepper plants by 24% on average (Fig.2). We destructively  
217 harvested all pepper plant biomass at the end of the season. z3HAC-treated pepper plants had  
218 lower leaf, stem, and root dry biomass by 21%, 31%, 29%, respectively (Fig.2a-c) ( $Z=3.379$ ,  
219  $P<0.001$ ;  $Z=-2.035$ ,  $P=0.042$ ;  $Z=-2.379$ ,  $P=0.017$ ). Despite these z3HAC-mediated effects on  
220 biomass exposure, the aboveground-to-belowground biomass ratio was similar regardless of

221 treatment (Fig.2d;  $Z=0.31$ ,  $P=0.757$ ). That is, pepper plants treated with  $\alpha$ 3HAC were smaller  
222 relative to control plants.

223  $\alpha$ 3HAC treatment also differentially affected reproductive output between the two  
224 species, and lowered fruit output in pepper. Flower production was 30% higher in lima bean  
225 plants exposed to  $\alpha$ 3HAC (Fig.3a;  $F_{1,576}=15.044$ ,  $P<0.001$ ), while  $\alpha$ 3HAC-treated peppers  
226 produced 37% fewer flowers relative to control plants at the end of the field season (Fig.3b;  
227  $F_{1,43}=14.48$ ,  $P<0.001$ ).  $\alpha$ 3HAC-treated pepper plants also produced 23% fewer fruits overall  
228 relative to controls (Fig.4a;  $Z=-2.035$ ,  $P=0.042$ ), and the fruits that were produced by  $\alpha$ 3HAC-  
229 treated plants had lower wet and dry masses (Fig.4b-c;  $Z=-2.88$ ,  $P=0.004$ ;  $Z=-2.439$ ,  $P=0.015$ ),  
230 and 10% lower total seed counts (Fig.4d;  $Z=3.524$ ,  $P<0.001$ ) and total seed masses (Fig.4e;  
231  $Z=3.334$ ,  $P<0.001$ ), relative to controls. Even though total fruit and seed production was reduced  
232 by  $\alpha$ 3HAC treatment, the ratio of seed mass to fruit mass was similar between  $\alpha$ 3HAC-treated  
233 and control plants (Fig.4f;  $Z=0.588$ ,  $P=0.807$ ). Moreover, the estimated mass of an individual  
234 seed was similar between  $\alpha$ 3HAC-treated plants and controls in pepper (Supplemental Fig.3).  
235 There was no apparent difference in lima bean pod production (Supplemental Fig.3). However,  
236 an unexpected field-wide premature pod drop that was independent of treatment prevented us  
237 from determining lima bean seed production with confidence.

238  $\alpha$ 3HAC exposure reduced natural herbivory in lima bean but not pepper plants. Chewing  
239 herbivory on pepper plants was low throughout the season and statistically higher in  $\alpha$ 3HAC-  
240 treated plants; however, this effect was driven by only the first assessment date (Fig.5a,  
241  $F_{=1,193}=5.627$ ,  $P=0.019$ ). In contrast, chewing damage to lima bean leaves increased as the field  
242 season progressed, with  $\alpha$ 3HAC-treated plants having overall 26% less chewing damage than did  
243 control plants (Fig.5b;  $F_{1,539}=21.745$ ,  $P<0.001$ ). In addition to chewing herbivory, black bean

244 aphids (*Aphis faba*) colonized 87% of the z3HAC-treated lima bean plants, compared with only  
245 21% of control plants (Fig.5c;  $\chi^2 = 50.11$ ,  $df=1$ ,  $P<0.001$ ). *A.faba* colonized early in the season  
246 and was only observed June 15-31 (Julian dates 166-181) because a heavy rainfall event reduced  
247 their population to undetectable levels. Piercing/sucking herbivores were rare for the remainder  
248 of the experiment.

249

## 250 **Discussion**

251 We show that a persistent, low-dose application of z3HAC differentially affects growth  
252 and reproduction in two plant species under identical field conditions. Based on previous work  
253 on plant defense priming and sensory perception of volatiles (Frost et al., 2007, Engelberth et al.,  
254 2004), we hypothesized z3HAC application would decrease growth and reproductive fitness in  
255 both plant species. The rationale for this hypothesis was a central assumption of induced  
256 resistance theory that ecological costs modulate the deployment particular defensive phenotypes  
257 until necessary (Agrawal, 1999, Baldwin, 1998, Cipollini et al., 2003, Didiano et al., 2014,  
258 Koricheva, 2002, Cipollini and Heil, 2010, Mauricio, 1998). Volatile-mediated priming, even if  
259 regulated by a different mechanism from resistance (Hilker et al., 2016), is an inducible  
260 phenomenon that theoretically should incur such fitness costs (Martinez-Medina et al., 2016).  
261 Yet, our results clearly indicate that pepper and lima bean had divergent fitness outcomes when  
262 subjected to a single GLV under identical field conditions. Whereas z3HAC-treated pepper  
263 plants had reduced growth (Fig. 1) and no effect on herbivore resistance (Fig. 5) relative to  
264 controls, z3HAC-treated lima bean plants grew more and produced more flowers (Fig. 1), and  
265 suffered less chewing herbivory (Fig. 5b) compared to controls. This result—that some plants  
266 experience fitness costs while others have minimal or even positive effects when exposed to the

267 same HIPV—has important implications for how volatile cues may structure interspecific  
268 competition and ecological communities. That is, HIPVs alone may be sufficient to influence  
269 plant communities if their presence results in differential fitness effects among species.

270         What might affect the response of plants to volatile exposure? One possibility is that  
271 differences in life history traits among plant species influence plant sensory perception and the  
272 outcome of defense priming. For example, short-lived semelparous (annual) species may invest  
273 more into reproductive output when exposed to herbivory (Pilson and Decker, 2002), whereas  
274 iteroparous (perennial) species may reserve resources for growth and reproduction for times  
275 when herbivores are absent (Hughes, 2017, Miller et al., 2008). Additionally, annuals may  
276 optimize reproductive output over seed quality to increase progeny success, where perennials  
277 may do the opposite (Rasmann et al., 2012, Blue et al., 2015). It is plausible that herbivore-  
278 associated cues such as  $\alpha$ 3HAC may induce similar divergent fitness effects between annual and  
279 perennial species as those induced by herbivory. Previous work on the role of HIPVs in plant  
280 anti-herbivore resistance focused on priming-mediated defense with consistent results between  
281 annual and perennial species: wheat (Ameje et al., 2015, Walters et al., 2008), corn (Engelberth  
282 et al., 2007, Farag et al., 2005), lima bean (Arimura et al., 2002, Choh and Takabayashi, 2006,  
283 Heil and Silva Bueno, 2007), tomato (Acevedo et al., 2017), blueberry (Rodriguez-Saona et al.,  
284 2009), sagebrush (Karban et al., 2006), and poplar (Frost et al., 2008b) all show evidence of  
285 defense priming and enhanced resistance. In contrast, we specifically focused on indicators of  
286 plant fitness in a semelparous species (lima bean) and an iteroparous species (pepper) (USDA,  
287 NRCS, 2018) in a common garden experiment. Consistent with effects observed with direct  
288 herbivory,  $\alpha$ 3HAC treatment alone increased growth and flowering in lima bean, while reducing  
289 growth and reproductive output in pepper (Fig. 3 and 5). Such divergent fitness effects from

290 exposure to a single ubiquitous herbivore-associated cue underscore the potential for functional  
291 similarity in the mechanisms by which annual and perennial plants modulate responses to  
292 herbivory and volatile indicators of herbivory.

293 Flower and fruit production is a key component of plant fitness potential. We show that  
294  $\alpha$ 3HAC treatment alone differentially affected flower production in lima bean and pepper (Fig.  
295 3). Insect herbivory can increase or decrease floral production depending on the system and  
296 environmental conditions (Lucas-Barbosa, 2016, Agrawal et al., 1999, Pashalidou et al., 2013).  
297 Whereas increased flower production is a strategy assumed to ameliorate fitness losses in the  
298 presence of an environmental stress (Agrawal, 2000, Agrawal, 1999), decreased flower  
299 production may be related to costs of chemically mediated defense (Heath et al., 2014).  
300 Additionally, herbivory affects floral attractiveness (Halpern et al., 2010, Hoffmeister and  
301 Junker, 2016), which may ultimately influence fitness (Kessler et al., 2011). Our data indicate  
302 that a volatile cue alone is sufficient to trigger changes in floral biology, but the magnitude and  
303 direction of those changes are plant species-specific. Additionally,  $\alpha$ 3HAC-treated pepper  
304 produced fewer fruits (Fig. 4) but lima bean did not (Supplemental Fig. 3). The mechanisms  
305 underlying  $\alpha$ 3HAC-mediated effects on flower and fruit production are unknown, but may be  
306 similar to those induced by herbivory (Lucas-Barbosa, 2016).

307 Resource allocation between different tissues is pivotal for growth, reproduction, and  
308 defense, and can be influenced by environmental stress. For example, direct herbivory alters  
309 resource allocation between aboveground tissue and belowground tissue (Frost and Hunter,  
310 2008, Machado et al., 2013, Eichenberg et al., 2015), as does application of the anti-herbivore  
311 phytohormone jasmonic acid (Gomez et al., 2010, Schweiger et al., 2014). Volatile cues can  
312 also affect biomass allocation. For example, barley exposed to volatiles from unwounded

313 neighboring plants of different cultivars increases root and leaf biomass (Ninkovic, 2003), while  
314 exposure to volatiles decreases aboveground biomass in other systems (Lu et al., 2017, Cipollini,  
315 2010). In our case, volatile treatment reduced overall aboveground and belowground biomass in  
316 pepper, but did not appear to alter overall biomass allocation patterns. In other words,  $\alpha$ 3HAC-  
317 treated pepper plants were smaller overall, and therefore produced fewer seeds.

318 Volatile cues may impact ecological communities in both expected and pleiotropic ways.  
319 HIPVs are well-established mediators of multitrophic antagonistic and mutualistic interactions  
320 (Kessler and Baldwin, 2001, Heil, 2008, Peñafior et al., 2017), and manipulations of chemical  
321 signals and volatile blends have been used for biological control in a wide range of systems  
322 (Stenberg et al., 2015, Peñafior and Bento, 2013). For example, HIPV-infused sticky traps in a  
323 grape (*Vitis vinifera*) orchard differentially attracted lacewings, hoverflies, and parasitoids  
324 (Lucchi et al., 2017). Exogenous GLV manipulation using “dispensers” under field conditions  
325 altered the arthropod community composition in maize (von Merrey et al., 2011). In our study,  
326 *A.faba* were clearly and unexpectedly attracted to  $\alpha$ 3HAC-exposed plants (Fig. 5). Under  
327 glasshouse conditions, *A.faba* were repelled by  $\alpha$ 3HAC alone (Webster et al., 2008), which  
328 suggests that the cue that mediated attraction was not our treatment alone. It is tempting to  
329 speculate that aphid attraction combined with reduced chewing herbivory in lima bean may be  
330 reflective of  $\alpha$ 3HAC effects on Jasmonic Acid (JA) and Salicylic Acid (SA) signaling, which  
331 would be consistent with a JA-SA tradeoff (Huot et al., 2014, Wei et al., 2014). Ultimately,  
332 however, the utility of GLVs (or other VOCs) in field applications will depend on understanding  
333 community-level effects of the application.

334 As a caveat, volatile identity, concentration, and duration may affect the reliability of a  
335 cue and therefore the costs associated with eavesdropping. Plants experiencing insect herbivory

336 frequently generate species-specific blends of volatile compounds (Ameye et al., 2017,  
337 Holopainen and Gershenzon, 2010), which can influence fitness in neighboring plants (Karban,  
338 2017, Caparrotta et al., 2018, Kessler et al., 2006). Plant-derived compounds associated with  
339 herbivory include GLVs (Lu et al., 2017, Farag et al., 2005, Frost et al., 2008b), phenylpropanoid  
340 derivatives (Erb et al., 2015), and terpenes (Arimura et al., 2012). However, individual  
341 compounds within a blend can affect plant defense and priming as much as the blend. We used  
342  $\alpha$ 3HAC in this study because it is released primarily from herbivore-damaged leaves and not just  
343 wounded leaves (Engelberth et al., 2004), which differs from other wound-released GLVs  
344 (Ameye et al., 2017, Matsui et al., 2012) and ostensibly allows  $\alpha$ 3HAC to confer reliable  
345 ecological information. Moreover, plants detect and respond specifically to  $\alpha$ 3HAC (Frost et al.,  
346 2008b), and the costs associated with that response were the focus of this investigation.  
347 Additionally, concentration of a cue may influence plant resistance (Lu et al., 2017, Bissmeyer et  
348 al., 2018). For example, a repeated, low-dose exposure to a GLV blend enhances plant resistance  
349 compared to a single application (Shiojiri et al., 2012) while  $\alpha$ 3HAC emissions can be as high as  
350  $66 \text{ ng/cm}^3$  after herbivory (Boggia et al., 2015). For these reasons, we chose to use a low-dose  
351 exposure to  $\alpha$ 3HAC (25% of the concentration that primed poplar (Frost et al., 2008b) and maize  
352 (Engelberth et al., 2004)), and still observed divergent fitness effects between the two plant  
353 species (Figs.1, 3, and 5).

354 In summary, our key finding is that a persistent application of a low dose of a single  
355 volatile compound  $\alpha$ 3HAC, a common HIPV and GLV, in field conditions leads to divergent  
356 growth and reproductive fitness effects between two plant species. This result underscores the  
357 variable nature of HIPV-eavesdropping, and that plants with different life histories may have  
358 evolved distinct mechanisms for responding to volatile cues. Ultimately, the adaptive

359 significance of eavesdropping for enhancing plant immunity will depend on plant life history,  
360 physiology, and other ecological factors to determine whether a plant will benefit from  
361 eavesdropping VOCs or not, and therefore what impact priming might have on plant  
362 communities.

363

### 364 **Acknowledgments**

365 We are grateful to Allie Peot and Abhinav Maurya for field assistance, and to A. Peot for  
366 assistance processing the plant materials in the laboratory. Comments from Heidi Appel, Ian  
367 Kaplan, and Amy Austin greatly improved the manuscript. We are grateful to A. Dale Josey and  
368 Susan Ballerstedt for permission and logistical support to work in the community gardens at  
369 Blackacre Conservancy. This work was supported by NSF-IOS grant 1656625 to CJF.

370

### 371 **Author Contributions**

372 CJF conceived the study. GEF and CJF designed the experiments. GEF performed the  
373 experiments. GEF and CJF analyzed the data, wrote the paper, and gave final approval for  
374 publication.



## 375 **References**

- 376 Accamando, A. K. & Cronin, J. T. (2012) Costs and Benefits of Jasmonic Acid Induced  
377 Responses in Soybean. *Environmental Entomology*, **41**, 551-561.
- 378 Acevedo, F. E., Peiffer, M., Tan, C. W., Stanley, B. A., Stanley, A., Wang, J., Jones, A. G.,  
379 Hoover, K., Rosa, C., Luthe, D. & Felton, G. (2017) Fall Armyworm-Associated Gut  
380 Bacteria Modulate Plant Defense Responses. *Molecular Plant-Microbe Interactions*, **30**,  
381 127-137.
- 382 Agrawal, A. A. (1999) Induced responses to herbivory in wild radish: Effects on several  
383 herbivores and plant fitness. *Ecology*, **80**, 1713-1723.
- 384 Agrawal, A. A. (2000) Overcompensation of plants in response to herbivory and the by-product  
385 benefits of mutualism. *Trends in Plant Science*, **5**, 309-313.
- 386 Agrawal, A. A., Strauss, S. Y. & Stout, M. J. (1999) Costs of induced responses and tolerance to  
387 herbivory in male and female fitness components of wild radish. *Evolution*, **53**, 1093-  
388 1104.
- 389 Ameye, M., Allmann, S., Verwaeren, J., Smagghe, G., Haesaert, G., Schuurink, R. C. &  
390 Audenaert, K. (2017) Green leaf volatile production by plants: a meta-analysis. *New*  
391 *Phytologist*, 1-18.
- 392 Ameye, M., Audenaert, K., De Zutter, N., Steppe, K., Van Meulebroek, L., Vanhaecke, L., De  
393 Vleeschauwer, D., Haesaert, G. & Smagghe, G. (2015) Priming of Wheat with the Green  
394 Leaf Volatile Z-3-Hexenyl Acetate Enhances Defense against *Fusarium graminearum*  
395 But Boosts Deoxynivalenol Production. *Plant Physiology*, **167**, 1671-1684.
- 396 Arimura, G., Matsui, K. & Takabayashi, J. (2009) Chemical and Molecular Ecology of  
397 Herbivore-Induced Plant Volatiles: Proximate Factors and Their Ultimate Functions.  
398 *Plant and Cell Physiology*, **50**, 911-923.
- 399 Arimura, G., Muroi, A. & Nishihara, M. (2012) Plant-plant-plant communications, mediated by  
400 (E)-beta-ocimene emitted from transgenic tobacco plants, prime indirect defense  
401 responses of lima beans. *Journal of Plant Interactions*, **7**, 193-196.
- 402 Arimura, G., Ozawa, R., Nishioka, T., Boland, W., Koch, T., Kuhnemann, F. & Takabayashi, J.  
403 (2002) Herbivore-induced volatiles induce the emission of ethylene in neighboring lima  
404 bean plants. *Plant Journal*, **29**, 87-98.
- 405 Arimura, G. I., Kopke, S., Kunert, M., Volpe, V., David, A., Brand, P., Dabrowska, P., Maffei,  
406 M. E. & Boland, W. (2008) Effects of feeding *Spodoptera littoralis* on lima bean leaves:  
407 IV. Diurnal and nocturnal damage differentially initiate plant volatile emission. *Plant*  
408 *Physiology*, **146**, 965-973.
- 409 Baldwin, I. T. (1998) Jasmonate-induced responses are costly but benefit plants under attack in  
410 native populations. *Proceedings of the National Academy of Sciences of the United States*  
411 *of America*, **95**, 8113-8118.
- 412 Ballhorn, D. J., Schiwy, S., Jensen, M. & Heil, M. (2008) Quantitative Variability of Direct  
413 Chemical Defense in Primary and Secondary Leaves of Lima Bean (*Phaseolus lunatus*)  
414 and Consequences for a Natural Herbivore. *Journal of Chemical Ecology*, **34**, 1298-1301.
- 415 Bissmeyer, S., Freundlich, G. & Frost, C. (2018) The influence of dose of a plant-derived  
416 volatile cue on *Arabidopsis thaliana* resistance against  
417 insect herbivores. *Kentucky Journal of Undergraduate Research*, **2**, 84-95.

- 418 Blue, E., Kay, J., Younginger, B. S. & Ballhorn, D. J. (2015) Differential effects of type and  
419 quantity of leaf damage on growth, reproduction and defence of lima bean (*Phaseolus*  
420 *lunatus* L.). *Plant Biology*, **17**, 712-719.
- 421 Boggia, L., Sgorbini, B., Berteza, C. M., Cagliero, C., Bicchi, C., Maffei, M. E. & Rubiolo, P.  
422 (2015) Direct Contact-Sorptive Tape Extraction coupled with Gas Chromatography-Mass  
423 Spectrometry to reveal volatile topographical dynamics of lima bean (*Phaseolus lunatus*  
424 L.) upon herbivory by *Spodoptera littoralis* Boisd. *BMC Plant Biology*, **15**, 1-13.
- 425 Caparrotta, S., Boni, S., Taiti, C., Palm, E., Mancuso, S. & Pandolfi, C. (2018) Induction of  
426 priming by salt stress in neighboring plants. *Environmental and Experimental Botany*,  
427 **147**, 261-270.
- 428 Choh, Y. & Takabayashi, J. (2006) Herbivore-induced extrafloral nectar production in lima bean  
429 plants enhanced by previous exposure to volatiles from infested conspecifics. *Journal of*  
430 *Chemical Ecology*, **32**, 2073-2077.
- 431 Cipollini, D. (2010) Constitutive expression of methyl jasmonate-inducible responses delays  
432 reproduction and constrains fitness responses to nutrients in *Arabidopsis thaliana*.  
433 *Evolutionary Ecology*, **24**, 59-68.
- 434 Cipollini, D. & Heil, a. M. (2010) Costs and benefits of induced resistance to herbivores and  
435 pathogens in plants. *CAB International*, **5**, 1-25.
- 436 Cipollini, D., Purrington, C. B. & Bergelson, J. (2003) Costs of induced responses in plants.  
437 *Basic and Applied Ecology*, **4**, 79-89.
- 438 Copolovici, L., Kannaste, A., Rimmel, T., Vislap, V. & Niinemets, U. (2011) Volatile Emissions  
439 from *Alnus glutinosa* Induced by Herbivory are Quantitatively Related to the Extent of  
440 Damage. *Journal of Chemical Ecology*, **37**, 18-28.
- 441 D'Auria, J. C., Pichersky, E., Schaub, A., Hansel, A. & Gershenzon, J. (2007) Characterization  
442 of a BAHD acyltransferase responsible for producing the green leaf volatile (Z)-3-hexen-  
443 1-yl acetate in *Arabidopsis thaliana*. *Plant Journal*, **49**, 194-207.
- 444 Didiano, T. J., Turley, N. E., Everwand, G., Schaefer, H., Crawley, M. J. & Johnson, M. T. J.  
445 (2014) Experimental test of plant defence evolution in four species using long-term rabbit  
446 enclosures. *Journal of Ecology*, **102**, 584-594.
- 447 Douma, J. C., Vermeulen, P. J., Poelman, E. H., Dicke, M. & Anten, N. P. R. (2017) When does  
448 it pay off to prime for defense? A modeling analysis. *New Phytologist*, **216**, 782-797.
- 449 Eichenberg, D., Purschke, O., Ristok, C., Wessjohann, L. & Bruelheide, H. (2015) Trade-offs  
450 between physical and chemical carbon-based leaf defence: of intraspecific variation and  
451 trait evolution. *Journal of Ecology*, **103**, 1667-1679.
- 452 Engelberth, J., Alborn, H. T., Schmelz, E. A. & Tumlinson, J. H. (2004) Airborne signals prime  
453 plants against insect herbivore attack. *Proceedings of the National Academy of Sciences*  
454 *of the United States of America*, **101**, 1781-1785.
- 455 Engelberth, J., Seidl-Adams, I., Schultz, J. C. & Tumlinson, J. H. (2007) Insect elicitors and  
456 exposure to green leafy volatiles differentially upregulate major octadecanoids and  
457 transcripts of 12-oxo phytodienoic acid reductases in *Zea mays*. *Molecular Plant-*  
458 *Microbe Interactions*, **20**, 707-716.
- 459 Erb, M., Veyrat, N., Robert, C. A. M., Xu, H., Frey, M., Ton, J. & Turlings, T. C. J. (2015)  
460 Indole is an essential herbivore-induced volatile priming signal in maize. pp. 1-10.  
461 *Nature communications*.
- 462 Farag, M. A., Fokar, M., Zhang, H. A., Allen, R. D. & Pare, P. W. (2005) (Z)-3-Hexenol induces  
463 defense genes and downstream metabolites in maize. *Planta*, **220**, 900-909.

- 464 Farag, M. A. & Paré, P. W. (2002) C6-Green leaf volatiles trigger local and systemic VOC  
465 emissions in tomato. *Phytochemistry*, **61**, 545-554.
- 466 Farag, M. A., Zhang, H. M. & Ryu, C. M. (2013) Dynamic Chemical Communication between  
467 Plants and Bacteria through Airborne Signals: Induced Resistance by Bacterial Volatiles.  
468 *Journal of Chemical Ecology*, **39**, 1007-1018.
- 469 Frost, C. J., Appel, M., Carlson, J. E., De Moraes, C. M., Mescher, M. C. & Schultz, J. C. (2007)  
470 Within-plant signalling via volatiles overcomes vascular constraints on systemic  
471 signalling and primes responses against herbivores. *Ecology Letters*, **10**, 490-498.
- 472 Frost, C. J. & Hunter, M. D. (2004) Insect canopy herbivory and frass deposition affect soil  
473 nutrient dynamics and export in oak mesocosms. *Ecology*, **85**, 3335-3347.
- 474 Frost, C. J. & Hunter, M. D. (2008) Herbivore-induced shifts in carbon and nitrogen allocation in  
475 red oak seedlings. *New Phytologist*, **178**, 835-845.
- 476 Frost, C. J., Mescher, M. C., Carlson, J. E. & De Moraes, C. M. (2008a) Plant defense priming  
477 against herbivores: Getting ready for a different battle. *Plant Physiology*, **146**, 818-824.
- 478 Frost, C. J., Mescher, M. C., Dervinis, C., Davis, J. M., Carlson, J. E. & De Moraes, C. M.  
479 (2008b) Priming defense genes and metabolites in hybrid poplar by the green leaf volatile  
480 cis-3-hexenyl acetate. *New Phytologist*, **180**, 722-733.
- 481 Gomez, S., Ferrieri, R. A., Schueller, M. & Orians, C. M. (2010) Methyl jasmonate elicits rapid  
482 changes in carbon and nitrogen dynamics in tomato. *New Phytologist*, **188**, 835-844.
- 483 Halpern, S. L., Adler, L. S. & Wink, M. (2010) Leaf herbivory and drought stress affect floral  
484 attractive and defensive traits in *Nicotiana quadrivalvis*. *Oecologia*, **163**, 961-971.
- 485 Heath, J. J., Kessler, A., Woebbe, E., Cipollini, D. & Stireman, J. O. (2014) Exploring plant  
486 defense theory in tall goldenrod, *Solidago altissima*. *New Phytologist*, **202**, 1357-1370.
- 487 Heil, M. (2008) Indirect defence via tritrophic interactions. *New Phytologist*, **178**, 41-61.
- 488 Heil, M. & Adame-Alvarez, R. M. (2010) Short signalling distances make plant communication  
489 a soliloquy. *Biology Letters*, **6**, 843-845.
- 490 Heil, M. & Karban, R. (2010) Explaining evolution of plant communication by airborne signals.  
491 *Trends in Ecology & Evolution*, **25**, 137-144.
- 492 Heil, M. & Silva Bueno, J. C. (2007) Within-plant signaling by volatiles leads to induction and  
493 priming of an indirect plant defense in nature. *Proceedings of the National Academy of  
494 Sciences of the United States of America*, **104**, 5467-5472.
- 495 Hilker, M., Schwachtje, J., Baier, M., Balazadeh, S., Baurle, I., Geiselhardt, S., Hinch, D. K.,  
496 Kunze, R., Mueller-Roeber, B., Rillig, M. G., Rolff, J., Romeis, R., Schmulling, T.,  
497 Steppuhn, A., van Dongen, J., Whitcomb, S. J., Wurst, S., Zuther, E. & Kopka, J. (2016)  
498 Priming and memory of stress responses in organisms lacking a nervous system.  
499 *Biological Reviews*, **91**, 1118-1133.
- 500 Hoffmeister, M. & Junker, R. R. (2016) Herbivory-induced changes in the olfactory and visual  
501 display of flowers and extrafloral nectaries affect pollinator behavior. *Evolutionary  
502 Ecology*, 1-16.
- 503 Holopainen, J. K. & Gershenzon, J. (2010) Multiple stress factors and the emission of plant  
504 VOCs. *Trends in Plant Science*, **15**, 176-184.
- 505 Hughes, P. W. (2017) Between semelparity and iteroparity: Empirical evidence for a continuum  
506 of modes of parity. *Ecology and Evolution*, **7**, 8232-8261.
- 507 Huot, B., Yao, J., Montgomery, B. L. & He, S. Y. (2014) Growth-Defense Tradeoffs in Plants: A  
508 Balancing Act to Optimize Fitness. *Molecular Plant*, **7**, 1267-1287.

- 509 Karban, R. (2017) Tradeoff between resistance induced by volatile communication and over-  
510 topping vertical growth. *Plant Signaling & Behavior*, 1-5.
- 511 Karban, R. & Maron, J. (2002) The fitness consequences of interspecific eavesdropping between  
512 plants. *Ecology*, **83**, 1209-1213.
- 513 Karban, R., Shiojiri, K., Huntzinger, M. & McCall, A. C. (2006) Damage-induced resistance in  
514 sagebrush: Volatiles are key to intra- and interplant communication. *Ecology*, **87**, 922-  
515 930.
- 516 Kessler, A. & Baldwin, I. T. (2001) Defensive function of herbivore-induced plant volatile  
517 emissions in nature. *Science*, **291**, 2141-2144.
- 518 Kessler, A., Halitschke, R., Diezel, C. & Baldwin, I. T. (2006) Priming of plant defense  
519 responses in nature by airborne signaling between *Artemisia tridentata* and *Nicotiana*  
520 *attenuata*. *Oecologia*, **148**, 280-292.
- 521 Kessler, A., Halitschke, R. & Poveda, K. (2011) Herbivory-mediated pollinator limitation:  
522 negative impacts of induced volatiles on plant-pollinator interactions. *Ecology*, **92**, 1769-  
523 1780.
- 524 Koricheva, J. (2002) Meta-analysis of sources of variation in fitness costs of plant antiherbivore  
525 defenses. *Ecology*, **83**, 176-190.
- 526 Lu, H. B., Xu, S. Y., Zhang, W. J., Xu, C. M., Li, B. X., Zhang, D. X., Mu, W. & Liu, F. (2017)  
527 Nematicidal Activity of trans-2-Hexenal against Southern Root-Knot Nematode  
528 (*Meloidogyne incognita*) on Tomato Plants. *Journal of Agricultural and Food Chemistry*,  
529 **65**, 544-550.
- 530 Lucas-Barbosa, D. (2016) Integrating Studies on Plant-Pollinator and Plant-Herbivore  
531 Interactions. *Trends in Plant Science*, **21**, 125-133.
- 532 Lucchi, A., Loni, A., Gandini, L. M., Scaramozzino, P., Ioriatti, C., Ricciardi, R. & Shearer, P.  
533 W. (2017) Using herbivore-induced plant volatiles to attract lacewings, hoverflies and  
534 parasitoid wasps in vineyards: achievements and constraints. *Bulletin of Insectology*, **70**,  
535 273-282.
- 536 Machado, R. A. R., Ferrieri, A. P., Robert, C. A. M., Glauser, G., Kallenbach, M., Baldwin, I. T.  
537 & Erb, M. (2013) Leaf-herbivore attack reduces carbon reserves and regrowth from the  
538 roots via jasmonate and auxin signaling. *New Phytologist*, **200**, 1234-1246.
- 539 Martinez-Medina, A., Flors, V., Heil, M., Mauch-Mani, B., Pieterse, C. M. J., Pozo, M. J., Ton,  
540 J., van Dam, N. M. & Conrath, U. (2016) Recognizing Plant Defense Priming. *Trends in*  
541 *Plant Science*, **21**, 818-822.
- 542 Matsui, K., Sugimoto, K., Mano, J. i., Ozawa, R. & Takabayashi, J. (2012) Differential  
543 Metabolisms of Green Leaf Volatiles in Injured and Intact Parts of a Wounded Leaf Meet  
544 Distinct Ecophysiological Requirements. *Plos One*, **7**.
- 545 Mauricio, R. (1998) Costs of resistance to natural enemies in field populations of the annual  
546 plant *Arabidopsis thaliana*. *American Naturalist*, **151**, 20-28.
- 547 McCormick, A. C., Irmisch, S., Reinecke, A., Boeckler, G. A., Veit, D., Reichelt, M., Hansson,  
548 B. S., Gershenzon, J., Kollner, T. G. & Unsicker, S. B. (2014) Herbivore-induced volatile  
549 emission in black poplar: regulation and role in attracting herbivore enemies. *Plant Cell*  
550 *and Environment*, **37**, 1909-1923.
- 551 Miller, T. E. X., Tenhumberg, B. & Louda, S. M. (2008) Herbivore-mediated ecological costs of  
552 reproduction shape the life history of an iteroparous plant. *American Naturalist*, **171**,  
553 141-149.

- 554 Muhlemann, J. K., Klempien, A. & Dudareva, N. (2014) Floral volatiles: from biosynthesis to  
555 function. *Plant Cell and Environment*, **37**, 1936-1949.
- 556 Mumm, R. & Dicke, M. (2010) Variation in natural plant products and the attraction of  
557 bodyguards involved in indirect plant defense. *Canadian Journal of Zoology-Revue*  
558 *Canadienne De Zoologie*, **88**, 628-667.
- 559 Ninkovic, V. (2003) Volatile communication between barley plants affects biomass allocation.  
560 *Journal of Experimental Botany*, **54**, 1931-1939.
- 561 Orrock, J., Connolly, B., Choi, W., Guiden, P., Swanson, S., & Gilroy, S. (2018) Plants  
562 eavesdrop on cues produced by snails and induce costly defenses that affect insect  
563 herbivores. *Oecologia*, **186**, 703-710.
- 564 Paschold, A., Halitschke, R. & Baldwin, I. T. (2006) Using 'mute' plants to translate volatile  
565 signals. *Plant Journal*, **45**, 275-291.
- 566 Pashalidou, F. G., Lucas-Barbosa, D., van Loon, J. J. A., Dicke, M. & Fatouros, N. E. (2013)  
567 Phenotypic plasticity of plant response to herbivore eggs: effects on resistance to  
568 caterpillars and plant development. *Ecology*, **94**, 702-713.
- 569 Pastor, V., Balmer, A., Gamir, J., Flors, V. & Mauch-Mani, B. (2014) Preparing to fight back:  
570 generation and storage of priming compounds. *Frontiers in Plant Science*, **5**.
- 571 Pearse, I. S., Hughes, K., Shiojiri, K., Ishizaki, S. & Karban, R. (2013) Interplant volatile  
572 signaling in willows: revisiting the original talking trees. *Oecologia*, **172**, 869-875.
- 573 Peñaflor, M. F. G. V. & Bento, J. M. S. (2013) Herbivore-induced plant volatiles to enhance  
574 biological control in agriculture. *Neotropical Entomology*, **42**, 331-343.
- 575 Peñaflor, M. F. G. V., Gonçalves, F. G., Colepicolo, C., Sanches, P. A. & Bento, J. M. S. (2017)  
576 Effects of single and multiple herbivory by host and non-host caterpillars on the  
577 attractiveness of herbivore-induced volatiles of sugarcane to the generalist parasitoid  
578 *Cotesia flavipes*. *Entomologia Experimentalis et Applicata*, **165**, 83-93.
- 579 Pilson, D. & Decker, K. L. (2002) Compensation for herbivory in wild sunflower: Response to  
580 simulated damage by the head-clipping weevil. *Ecology*, **83**, 3097-3107.
- 581 Rasmann, S., De Vos, M., Casteel, C. L., Tian, D. L., Halitschke, R., Sun, J. Y., Agrawal, A. A.,  
582 Felton, G. W. & Jander, G. (2012) Herbivory in the previous generation primes plants for  
583 enhanced insect resistance. *Plant Physiology*, **158**, 854-863.
- 584 Rodriguez-Saona, C. R., Rodriguez-Saona, L. E. & Frost, C. J. (2009) Herbivore-induced  
585 volatiles in the perennial shrub, *Vaccinium corymbosum*, and their role in inter-branch  
586 signaling. *Journal of Chemical Ecology*, **35**, 163-175.
- 587 Sarai Giron-Calva, P., Molina-Torres, J. & Heil, M. (2012) Volatile dose and exposure time  
588 impact perception in neighboring plants. *Journal of Chemical Ecology*, **38**, 226-228.
- 589 Schweiger, R., Heise, A. M., Persicke, M. & Muller, C. (2014) Interactions between the  
590 jasmonic and salicylic acid pathway modulate the plant metabolome and affect  
591 herbivores of different feeding types. *Plant Cell and Environment*, **37**, 1574-1585.
- 592 Shiojiri, K., Ozawa, R., Matsui, K., Sabelis, M. W. & Takabayashi, J. (2012) Intermittent  
593 exposure to traces of green leaf volatiles triggers a plant response. *Scientific Reports*, **2**.
- 594 Song, G. C. & Ryu, C. M. (2013) Two volatile organic compounds trigger plant self-defense  
595 against a bacterial pathogen and a sucking insect in cucumber under open field  
596 conditions. *International Journal of Molecular Sciences*, **14**, 9803-9819.
- 597 Stenberg, J. A., Heil, M., Ahman, I. & Bjorkman, C. (2015) Optimizing crops for biocontrol of  
598 pests and disease. *Trends in Plant Science*, **20**, 698-712.

- 599 Turlings, T. C. J., Loughrin, J. H., McCall, P. J., Rose, U. S. R., Lewis, W. J. & Tumlinson, J. H.  
600 (1995) How caterpillar-damaged plants protect themselves by attracting parasitic wasps.  
601 *Proceedings of the National Academy of Sciences of the United States of America*, **92**,  
602 4169-4174.
- 603 van Hulten, M., Pelser, M., van Loon, L. C., Pieterse, C. M. J. & Ton, J. (2006) Costs and  
604 benefits of priming for defense in Arabidopsis. *Proceedings of the National Academy of*  
605 *Sciences of the United States of America*, **103**, 5602-5607.
- 606 von Merety, G., Veyrat, N., Mahuku, G., Valdez, R. L., Turlings, T. C. J. & D'Alessandro, M.  
607 (2011) Dispensing synthetic green leaf volatiles in maize fields increases the release of  
608 sesquiterpenes by the plants, but has little effect on the attraction of pest and beneficial  
609 insects. *Phytochemistry*, **72**, 1838-1847.
- 610 Walters, D. R., Paterson, L., Walsh, D. J. & Havis, N. D. (2008) Priming for plant defense in  
611 barley provides benefits only under high disease pressure. *Physiological and Molecular*  
612 *Plant Pathology*, **73**, 95-100.
- 613 Webster, B., Bruce, T., Dufour, S., Birkemeyer, C., Birkett, M., Hardie, J. & Pickett, J. (2008)  
614 Identification of volatile compounds used in host location by the black bean aphid, *Aphis*  
615 *fabae*. *Journal of Chemical Ecology*, **34**, 1153-1161.
- 616 Wei, J., van Loon, J. J. A., Gols, R., Menzel, T. R., Li, N., Kang, L. & Dicke, M. (2014)  
617 Reciprocal crosstalk between jasmonate and salicylate defence-signalling pathways  
618 modulates plant volatile emission and herbivore host-selection behaviour. *Journal of*  
619 *Experimental Botany*, **65**, 3289-3298.
- 620 Zachariah, T. J., Safeer, A. L., Jayarajan, K., Leela, N. K., Vipin, T. M., Saji, K. V., Shiva, K.  
621 N., Parthasarathy, V. A. & Mammooty, K. P. (2010) Correlation of metabolites in the  
622 leaf and berries of selected black pepper varieties. *Scientia Horticulturae*, **123**, 418-422.

623

624

625

626

627

628

629

630

631

632

633

634 **Figures**

635

636

637

638

639

640

641

642

643

644

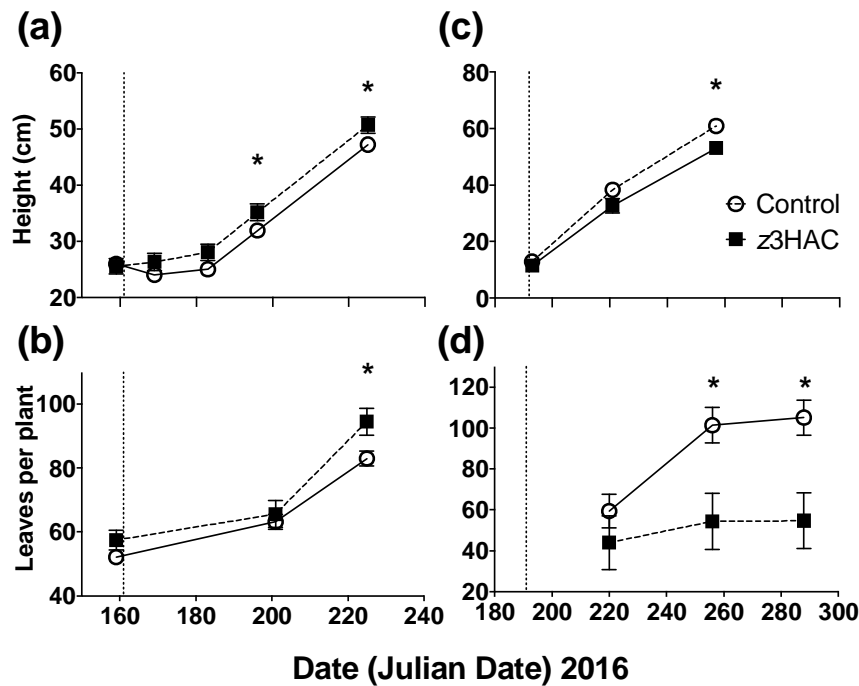

645 **Figure 1.** Height measurements and leaf counts for *Phaseolus lunatus* (lima bean) and *Capsicum*

646 *annuum* (pepper) grown in a common garden field experiment. Height for (a) lima bean was

647 measured from the base of the longest runner to the uppermost branching point; (c) pepper height

648 was measured from the base of the main stalk to the uppermost branching point. Leaf counts for

649 (b) lima bean and (d) pepper included all mature leaves on each plant. Open circles represent

650 control plants (receiving lanolin-filled vials); filled squares represent plants receiving a persistent

651 application of vials containing 10ng/hr *cis*-3-hexenyl acetate (*z3HAC*) dissolved in lanolin.

652 Dropdown lines indicate the initial application of *z3HAC* treatment: lima bean and pepper plants

653 were first exposed on June 10, 2016 (Julian date 161) and July 11, 2016 (Julian date 192),

654 respectively. Points represent averages  $\pm$  SE. Repeated measures ANOVAs (aov in R) were

655 followed by one-way ANOVAs at each time-point. Asterisks (\*) represent  $P < 0.05$  between

656 treatment and control at each time point. See Supplemental Table 1 for complete statistics.

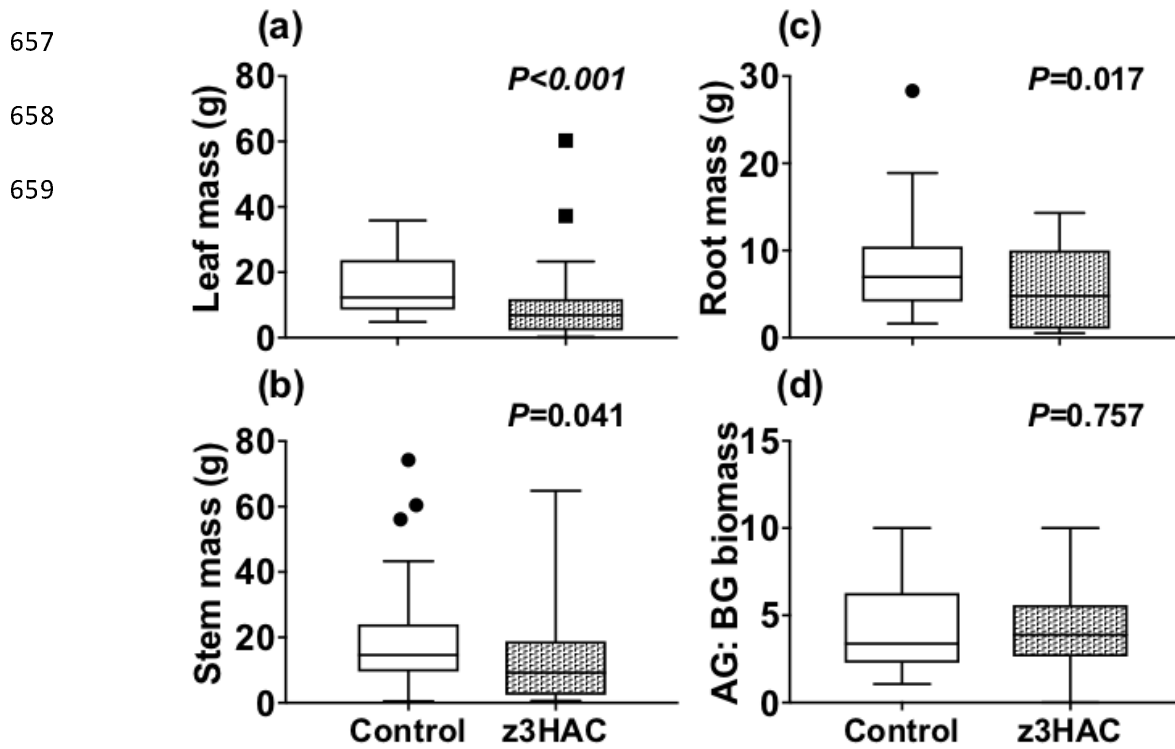

660 **Figure 2.** Biomass measurements of field-grown *Capsicum annuum* (pepper) plants. (a) Leaf, (b)  
661 stem, (c) root biomass, and (d) the aboveground:belowground biomass ratio in *C.annuum* plants  
662 were determined at the end of the field season following destructive harvest. Box plots  
663 represent the raw data ranging from the upper to the lower quartiles and the median. Error bars  
664 represent the 5% and 95% of the data, and individual dots are observations that fell outside of  
665 those parameters.  $P$ -values represent Tukey's HSD comparisons. See Supplemental Table 2 for  
666 complete statistics.

667

668

669

670

671

672



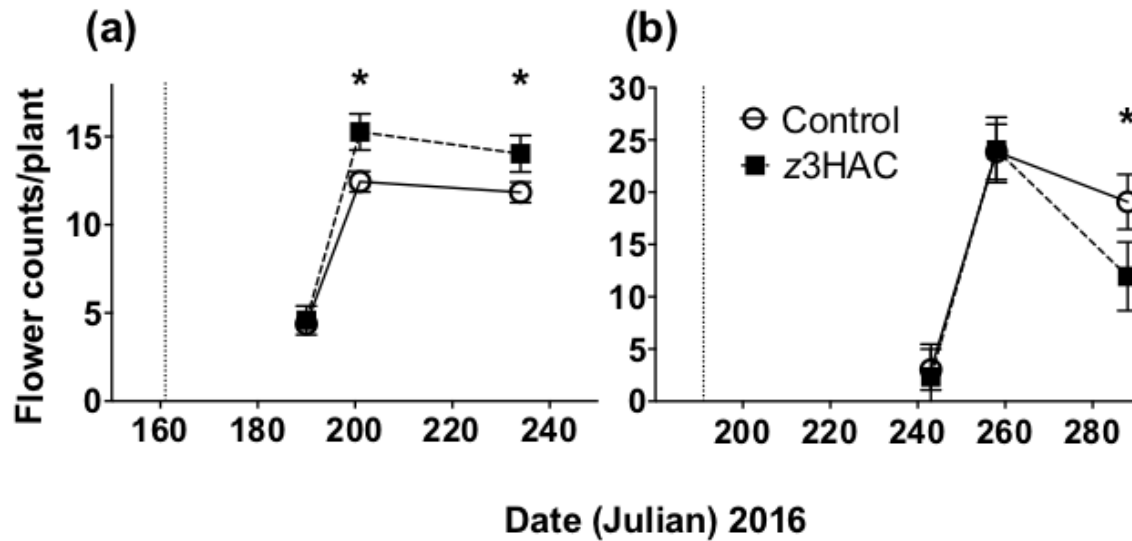

673

674 **Figure 3.** Total flower production in (a) *Phaseolus lunatus* (lima bean) and (b) *Capsicum*

675 *annuum* (pepper). Open circles represent control plants (receiving lanolin-only vials); filled

676 squares represent plants receiving a persistent application of vials containing 10ng/hr *cis*-3-

677 hexenyl acetate (z3HAC) dissolved in lanolin. Dropdown lines indicate the initial application of

678 z3HAC treatment: lima bean and pepper plants were first exposed on June 10, 2016 (Julian date

679 161) and July 11, 2016 (Julian date 192), respectively. Points represent averages +/- SE.

680 Asterisks (\*) represent  $P < 0.05$  between treatment and control at each time point. See

681 Supplemental Table 3 for complete statistics.

682

683

684

685

686

687

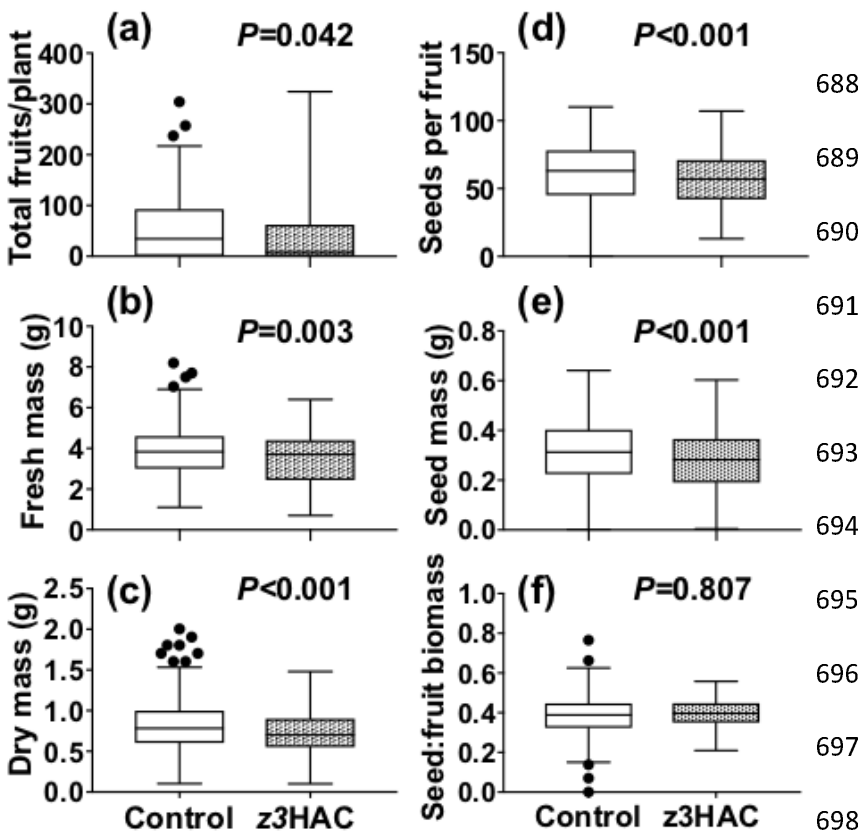

699 **Figure 4.** Fruit and seed production in *Capsicum annuum* (pepper) plants grown in a common  
700 garden experiment treated with a persistent application of the green leaf volatile *cis*-3-hexenyl  
701 acetate (z3HAC). The (a) total number of fruits were counted in the field, and (b) wet and (c) dry  
702 masses fruit masses were determined in the lab. (d) The total number of seeds per fruit and (e)  
703 the estimated mass per seed were determined from a subset of the fruits produced. (f) The ratio  
704 of seed mass to fruit mass was calculated to assess the efficiency of seed production. Box plots  
705 represent the raw data ranging from the upper to the lower quartiles and the median. White  
706 boxes represent control plants; gray boxes represent plants treated with z3HAC. Error bars  
707 represent the 5% and 95% of the data, and individual dots are observations that fell outside of  
708 those parameters. *P*-values represent Tukey's HSD comparisons. See Supplemental Table 4 for  
709 complete statistics.

710

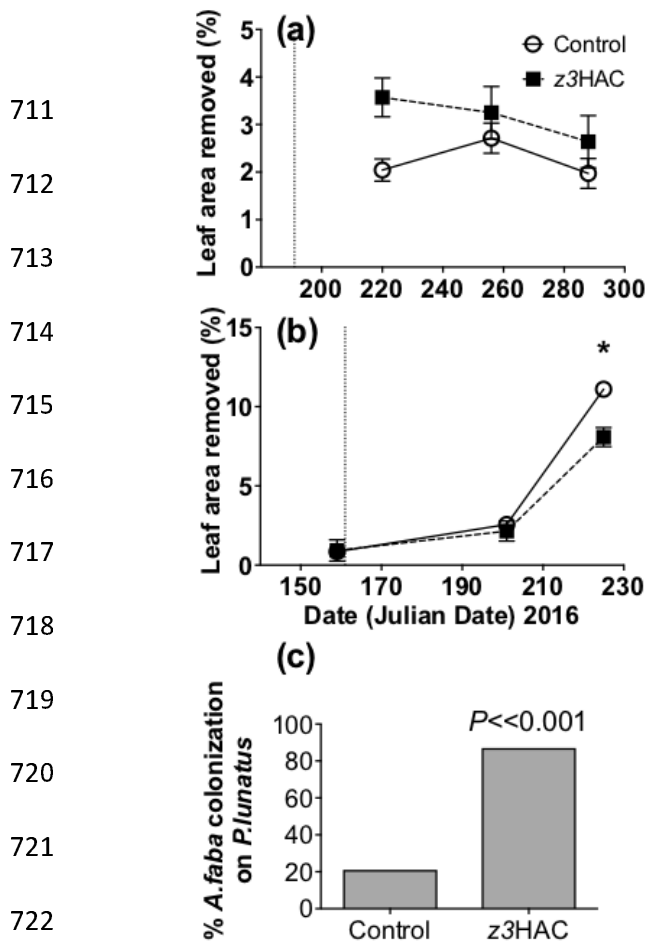

723 **Figure 5.** Herbivore damage on *Capsicum annuum* (pepper) and *Phaseolus lunatus* (lima bean)  
724 plants in a common garden field experiment. Chewing damage on (a) pepper and (b) lima bean  
725 plants was determined using a visual estimation technique (see Methods). Open circles represent  
726 control plants (receiving lanolin-filled vials); filled squares represent plants receiving a persistent  
727 application 10ng/hr *cis*-3-hexenyl acetate (z3HAC) dissolved in lanolin. Dropdown lines indicate  
728 the initial application of z3HAC treatment. Points represent averages  $\pm$  SE. Repeated  
729 measures ANOVAs (aov in R) were followed by one-way ANOVAs at each time-point.  
730 Asterisks (\*) represent  $P < 0.05$  between treatment and control at each time point. See  
731 Supplemental Table 5 for complete statistics. (c) *Aphis faba* colonization on lima bean plants.  
732 Bars represent the percentage of plants in each group where *A. faba* were observed ( $\chi^2 = 50.11$ ,  
733  $df=1$ ,  $P < 0.001$ ).
